# Supplementary material
Source: HighWire-hosted journal article supplement (https://jnnp.bmj.com/highwire/filestream/185069/field_highwire_adjunct_files/0/7991040webonlytable1.xls)
Supplement: 7991040webonlytable1.xls [file 7991040webonlytable1.xls]

## Sheet: Sup Tab1
Supplemental Table 1. 30 strata corresponding to each item (type of medical facility, department, number of beds), and total number of facilities in Japan, number of our surveyed facilities, sampling rate in each stratum, number of facilities responding and response rate in each stratum.
Stratum ID	Type of medical facility	Department	Number of beds	Total number of facilities	Number of surveyed facilities	Sampling rate	Number of facilities responding	Response rate
1	General	Neurology	20-99	395	395	100	170	0.43038
2			100-199	337	337	100	158	0.468843
3			200-299	167	167	100	88	0.526946
4			300-399	168	168	100	92	0.547619
5			400-499	112	112	100	73	0.651786
6			500+	161	161	100	93	0.57764
7		Internal medicine	20-99	2747	136	5	56	0.411765
8			100-199	991	98	10	34	0.346939
9			200-299	346	69	20	32	0.463768
10			300-399	212	85	40	42	0.494118
11			400-499	98	78	80	35	0.448718
12			500+	75	75	100	27	0.36
13		Pediatrics	20-99	1103	53	5	23	0.433962
14			100-199	680	64	10	43	0.671875
15			200-299	390	78	20	48	0.615385
16			300-399	341	136	40	98	0.720588
17			400-499	193	154	80	114	0.74026
18			500+	220	220	100	162	0.736364
19	University	Neurology	20-99	1	1	100	0	0
20			100-199	6	6	100	3	0.5
21			200-299	6	6	100	1	0.166667
22			300-399	7	7	100	4	0.571429
23			400-499	6	6	100	4	0.666667
24			500+	94	94	100	70	0.744681
25*		Pediatrics	20-99	0	NA	NA	NA	NA
26			100-199	3	3	100	2	0.666667
27			200-299	6	6	100	5	0.833333
28			300-399	10	10	100	9	0.9
29			400-499	6	6	100	3	0.5
30			500+	96	96	100	72	0.75
				7637	2827		1561	0.552175
Stratum: Each stratum ID is categorized by items such as type of medical facilities (general or university), department (neurology, internal medicine, or pediatrics), number of beds (20-99, 100-199, 200-299, 300-399, 400-499, 500+).
NA: not available
* Stratum 25 has no proper medical facility, the Prevalence number of the stratum could not be determined.
